# Supplementary material
Source: publisher site journal article supplement (https://www.spandidos-publications.com/6589/downloadSupplementary)
Supplement: Supplementary file 1 [file downloadSupplementary]

Table SI. Data investigation from healthy donors.

|                      |                        |                        |                        |
|----------------------|------------------------|------------------------|------------------------|
| Age, years           | 48                     | 46                     | 52                     |
| Sex                  | Male                   | Male                   | Male                   |
| Total number         | 3                      |                        |                        |
| Reason for admission | Routine physical exams | Routine physical exams | Routine physical exams |
| Tissue isolation     | Venous blood sampling  |                        |                        |

Table SII. List of primer sequences used for reverse-transcription quantitative PCR.

| Gene name               | Primer sequence (5'-3')                                |
|-------------------------|--------------------------------------------------------|
| h-SPP1(97bp)            | F: GAAGTTTCGCAGACCTGACAT<br>R: GTATGCACCATTCAACTCCTCG  |
| h-IL-1 $\alpha$ (147bp) | F: TGGTAGTAGCAACCAACGGGA<br>R: ACTTTGATTGAGGGCGTCATTC  |
| h-IL-1 $\beta$ (132bp)  | F: ATGATGGCTTATTACAGTGGCAA<br>R: GTCGGAGATTCGTAGCTGGA  |
| h-IL-10(112bp)          | F: GACTTTAAGGGTTACCTGGGTTG<br>R: TCACATGCGCCTTGATGTCTG |
| h-TNF- $\alpha$ (91bp)  | F: CCTCTCTCTAATCAGCCCTCTG<br>R: GAGGACCTGGGAGTAGATGAG  |
| h-TGF- $\beta$ (98bp)   | F: CTAATGGTGGAAACCCACAACG<br>R: TATCGCCAGGAATTGTTGCTG  |
| h-GAPDH(101bp)          | F: CTGGGCTACACTGAGCACC<br>R: AAGTGGTCGTTGAGGGCAATG     |
| m-IL-1 $\alpha$ (126bp) | F: CGAAGACTACAGTTCTGCCATT<br>R: GACGTTTCAGAGGTTCTCAGAG |
| m-IL-1 $\beta$ (89bp)   | F: GCAACTGTTCTGAACTCAACT<br>R: ATCTTTTGGGGTCCGTCAACT   |
| m-IL-6(76bp)            | F: TAGTCCTTCCTACCCCAATTTCC<br>R: TTGGTCCTTAGCCACTCCTTC |
| m-TGF- $\beta$ (133bp)  | F: CTCCCGTGGCTTCTAGTGC<br>R: GCCTTAGTTTGGACAGGATCTG    |
| m- $\alpha$ -SMA(102bp) | F: GTCCAGACATCAGGGAGTAA<br>R: TCGGATACTTCAGCGTCAGGA    |
| m-col3a1(103bp)         | F: CCTGGCTCAAATGGCTCAC<br>R: CAGGACTGCCGTTATTCCCG      |
| m-GAPDH(123bp)          | F: AGGTCGGTGTGAACGGATTTG<br>R: TGTAGACCATGTAGTTGAGGTCA |

F, forward; R, reverse; bp, base pairs; SPP1, secreted phosphoprotein 1.
